# Supplementary material for: Sex Differences in Survival from Neuroendocrine Neoplasia in England 2012–2018: A Retrospective, Population-Based Study
Source: MDPI journal article supplement (doi:10.3390/cancers15061863), 2023-03-20
Supplement: s1 [file s1]

**Supplementary Table S1.** Sex differential of NEN by main organ primary, stage and morphology. n, number of tumours; NET, neuroendocrine tumour; NEC, neuroendocrine carcinoma

|     |        | Site, n | Appendix, n=2,146 |       |       |       |       |       |       |       |
|-----|--------|---------|-------------------|-------|-------|-------|-------|-------|-------|-------|
|     |        | Stage   | I                 |       | II    |       | III   |       | IV    |       |
|     |        | Morph   | NET               | NEC   | NET   | NEC   | NET   | NEC   | NET   | NEC   |
| Sex | Male   | n       | 453               | 19    | 247   | 12    | 71    | 4     | 16    | 9     |
|     |        | %       | 41.0%             | 57.6% | 35.1% | 75.0% | 32.6% | 36.4% | 38.1% | 50.0% |
|     | Female | n       | 652               | 14    | 456   | 4     | 147   | 7     | 26    | 9     |
|     |        | %       | 59.0%             | 42.4% | 64.9% | 25.0% | 67.4% | 63.6% | 61.9% | 50.0% |

|     |        | Site, n | Caecum, n=528 |       |       |       |       |       |       |       |
|-----|--------|---------|---------------|-------|-------|-------|-------|-------|-------|-------|
|     |        | Stage   | I             |       | II    |       | III   |       | IV    |       |
|     |        | Morph   | NET           | NEC   | NET   | NEC   | NET   | NEC   | NET   | NEC   |
| Sex | Male   | n       | 3             | 1     | 8     | 4     | 75    | 23    | 72    | 42    |
|     |        | %       | 30.0%         | 50.0% | 38.1% | 44.4% | 44.1% | 48.9% | 41.6% | 43.8% |
|     | Female | n       | 7             | 1     | 13    | 5     | 95    | 24    | 101   | 54    |
|     |        | %       | 70.0%         | 50.0% | 61.9% | 55.6% | 55.9% | 51.1% | 58.4% | 56.3% |

|     |        | Site, n | Colon, n=509 |       |       |       |       |       |       |       |
|-----|--------|---------|--------------|-------|-------|-------|-------|-------|-------|-------|
|     |        | Stage   | I            |       | II    |       | III   |       | IV    |       |
|     |        | Morph   | NET          | NEC   | NET   | NEC   | NET   | NEC   | NET   | NEC   |
| Sex | Male   | n       | 25           | 4     | 5     | 10    | 28    | 43    | 59    | 124   |
|     |        | %       | 61.0%        | 80.0% | 41.7% | 47.6% | 60.9% | 64.2% | 62.8% | 55.6% |
|     | Female | n       | 16           | 1     | 7     | 11    | 18    | 24    | 35    | 99    |
|     |        | %       | 39.0%        | 20.0% | 58.3% | 52.4% | 39.1% | 35.8% | 37.2% | 44.4% |

|     |        | Site, n | Lung, n=4,661 |       |       |       |       |       |       |       |
|-----|--------|---------|---------------|-------|-------|-------|-------|-------|-------|-------|
|     |        | Stage   | I             |       | II    |       | III   |       | IV    |       |
|     |        | Morph   | NET           | NEC   | NET   | NEC   | NET   | NEC   | NET   | NEC   |
| Sex | Male   | n       | 660           | 119   | 132   | 46    | 84    | 105   | 167   | 541   |
|     |        | %       | 31.3%         | 38.5% | 40.1% | 47.4% | 39.3% | 52.0% | 44.9% | 52.5% |
|     | Female | n       | 1448          | 190   | 197   | 51    | 130   | 97    | 205   | 489   |
|     |        | %       | 68.7%         | 61.5% | 59.9% | 52.6% | 60.7% | 48.0% | 55.1% | 47.5% |

|     |        | Site, n | Pancreas, n=2,183 |       |       |       |       |       |       |       |
|-----|--------|---------|-------------------|-------|-------|-------|-------|-------|-------|-------|
|     |        | Stage   | I                 |       | II    |       | III   |       | IV    |       |
|     |        | Morph   | NET               | NEC   | NET   | NEC   | NET   | NEC   | NET   | NEC   |
| Sex | Male   | n       | 229               | 18    | 186   | 26    | 100   | 34    | 320   | 317   |
|     |        | %       | 52.2%             | 32.1% | 53.0% | 72.2% | 57.8% | 73.9% | 55.2% | 63.1% |
|     | Female | n       | 210               | 38    | 165   | 10    | 73    | 12    | 260   | 185   |
|     |        | %       | 47.8%             | 67.9% | 47.0% | 27.8% | 42.2% | 26.1% | 44.8% | 36.9% |

|  |  | Site, n | Rectum, n=948 |  |    |  |     |  |    |  |
|--|--|---------|---------------|--|----|--|-----|--|----|--|
|  |  | Stage   | I             |  | II |  | III |  | IV |  |

|     |        | Morph | NET   | NEC   | NET   | NEC   | NET   | NEC   | NET   | NEC   |
|-----|--------|-------|-------|-------|-------|-------|-------|-------|-------|-------|
| Sex | Male   | n     | 275   | 12    | 15    | 12    | 14    | 41    | 27    | 148   |
|     |        | %     | 52.9% | 57.1% | 55.6% | 63.2% | 56.0% | 64.1% | 62.8% | 64.6% |
|     | Female | n     | 245   | 9     | 12    | 7     | 11    | 23    | 16    | 81    |
|     |        | %     | 47.1% | 42.9% | 44.4% | 36.8% | 44.0% | 35.9% | 37.2% | 35.4% |

|     |        | Site, n | Small intestine, n=3,201 |       |       |       |       |       |       |       |
|-----|--------|---------|--------------------------|-------|-------|-------|-------|-------|-------|-------|
|     |        | Stage   | I                        |       | II    |       | III   |       | IV    |       |
|     |        | Morph   | NET                      | NEC   | NET   | NEC   | NET   | NEC   | NET   | NEC   |
| Sex | Male   | n       | 103                      | 1     | 167   | 8     | 710   | 29    | 676   | 110   |
|     |        | %       | 50.2%                    | 20.0% | 63.5% | 72.7% | 57.0% | 58.0% | 55.6% | 53.7% |
|     | Female | n       | 102                      | 4     | 96    | 3     | 536   | 21    | 540   | 95    |
|     |        | %       | 49.8%                    | 80.0% | 36.5% | 27.3% | 43.0% | 42.0% | 44.4% | 46.3% |

|     |        | Site, n | Stomach, n=658 |       |       |       |       |       |       |       |
|-----|--------|---------|----------------|-------|-------|-------|-------|-------|-------|-------|
|     |        | Stage   | I              |       | II    |       | III   |       | IV    |       |
|     |        | Morph   | NET            | NEC   | NET   | NEC   | NET   | NEC   | NET   | NEC   |
| Sex | Male   | n       | 70             | 4     | 36    | 15    | 16    | 48    | 44    | 174   |
|     |        | %       | 40.5%          | 50.0% | 52.2% | 75.0% | 64.0% | 73.8% | 65.7% | 75.3% |
|     | Female | n       | 103            | 4     | 33    | 5     | 9     | 17    | 23    | 57    |
|     |        | %       | 59.5%          | 50.0% | 47.8% | 25.0% | 36.0% | 26.2% | 34.3% | 24.7% |
